# Supplementary material for: The establishment of a marine focused biorefinery for bioethanol production using seawater and a novel marine yeast strain
Source: PubMed Central journal article supplement (PMC6092365; doi:10.1038/s41598-018-30660-x), 2018-08-14
Supplement: 41598_2018_30660_MOESM1_ESM.pdf [file 41598_2018_30660_MOESM1_ESM.pdf]

## **Electronic Supplementary Information for:**

### **The establishment of marine focused biorefinery for bioethanol production using seawater and a novel marine yeast strain**

**Abdelrahman Saleh Zaky\*<sup>a, b, c</sup>, Darren Greetham<sup>a, b</sup>, Gregory A. Tucker<sup>b</sup> and Chenyu Du\*<sup>a, b</sup>**

<sup>a</sup> School of Applied Sciences, University of Huddersfield, Huddersfield HD1 3DH, UK.

<sup>b</sup> School of Biosciences, University of Nottingham, Nottingham LE12 5RD, UK.

<sup>c</sup> Department of Microbiology, Faculty of Agriculture, Cairo University, Giza 12613, Egypt.

#### **\* Corresponding authors:**

**Dr Abdelrahman Zaky:** A.Zaky@cu.edu.eg

**Dr Chenyu Du:** C.Du@hud.ac.uk

#### **Contents**

Seven pages (including the cover sheet)

One Table (ST1), four figures (SF1 to SF4) and References

**Table ST1. The composition of synthetic seawater used in this study.**

| <b>Component</b>         | <b>Concentration g/L</b>     |                                     |
|--------------------------|------------------------------|-------------------------------------|
|                          | <b>Standard<br/>(1X SSW)</b> | <b>Double strength<br/>(2X SSW)</b> |
| <b>NaCl</b>              | 27.133                       | 54.266                              |
| <b>MgCl<sub>2</sub></b>  | 2.504                        | 5.008                               |
| <b>MgSO<sub>4</sub></b>  | 3.382                        | 6.764                               |
| <b>CaCl<sub>2</sub></b>  | 1.167                        | 2.334                               |
| <b>KCl</b>               | 0.742                        | 1.484                               |
| <b>NaHCO<sub>3</sub></b> | 0.207                        | 0.414                               |
| <b>NaBr</b>              | 0.085                        | 0.17                                |
| <b>Total salts</b>       | <b>35.22</b>                 | <b>70.44</b>                        |

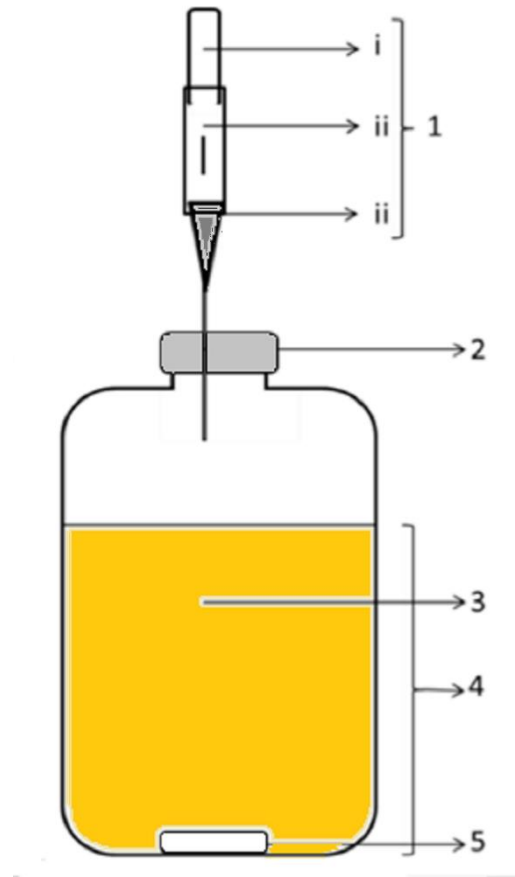

**SF1: Schematic diagram of Mini Fermentation Vessel (MFV) for anaerobic fermentation**

1, Bunsen valve (i, Durham tube; ii, Silicone tubing with a small cut in the middle; iii, Hypodermic needle), 2, rubber septum with metal crimp; 3, glass bottle; 4, working volume (100 mL); 5, magnetic flea.

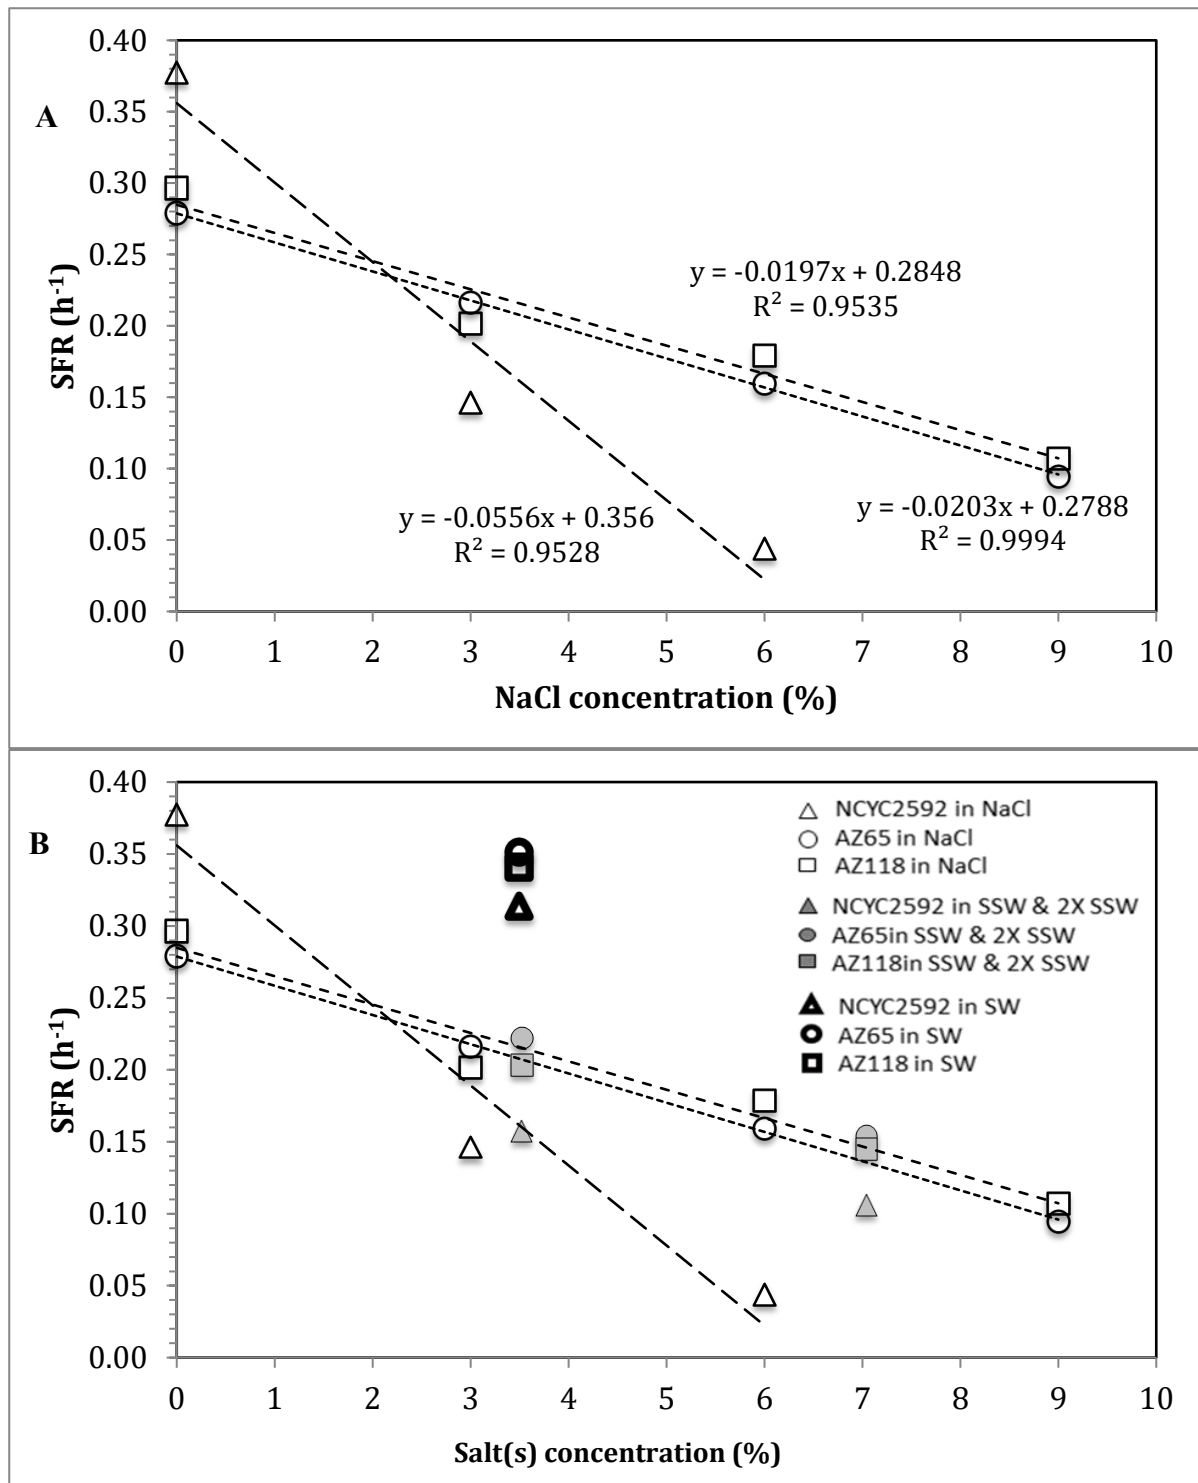

**SF2: Specific Fermentation Rate (SFR) of marine yeasts (*S. cerevisiae* AZ65, AZ118) and the reference terrestrial yeast (*S. cerevisiae* NCYC 2592) in media containing different salt concentrations**

**(A)** Calculating SFR of yeasts in media containing different NaCl concentrations (0-9%). The calculation was conducted based on the WL data presented in Figures 2A-2D.

**(B)** Comparing the SFR of yeasts in media containing different salt concentrations (NaCl (0-9%), SW, SSW & 2XSSW) . The calculation was conducted based on the WL data presented in Figures 2A-2G.

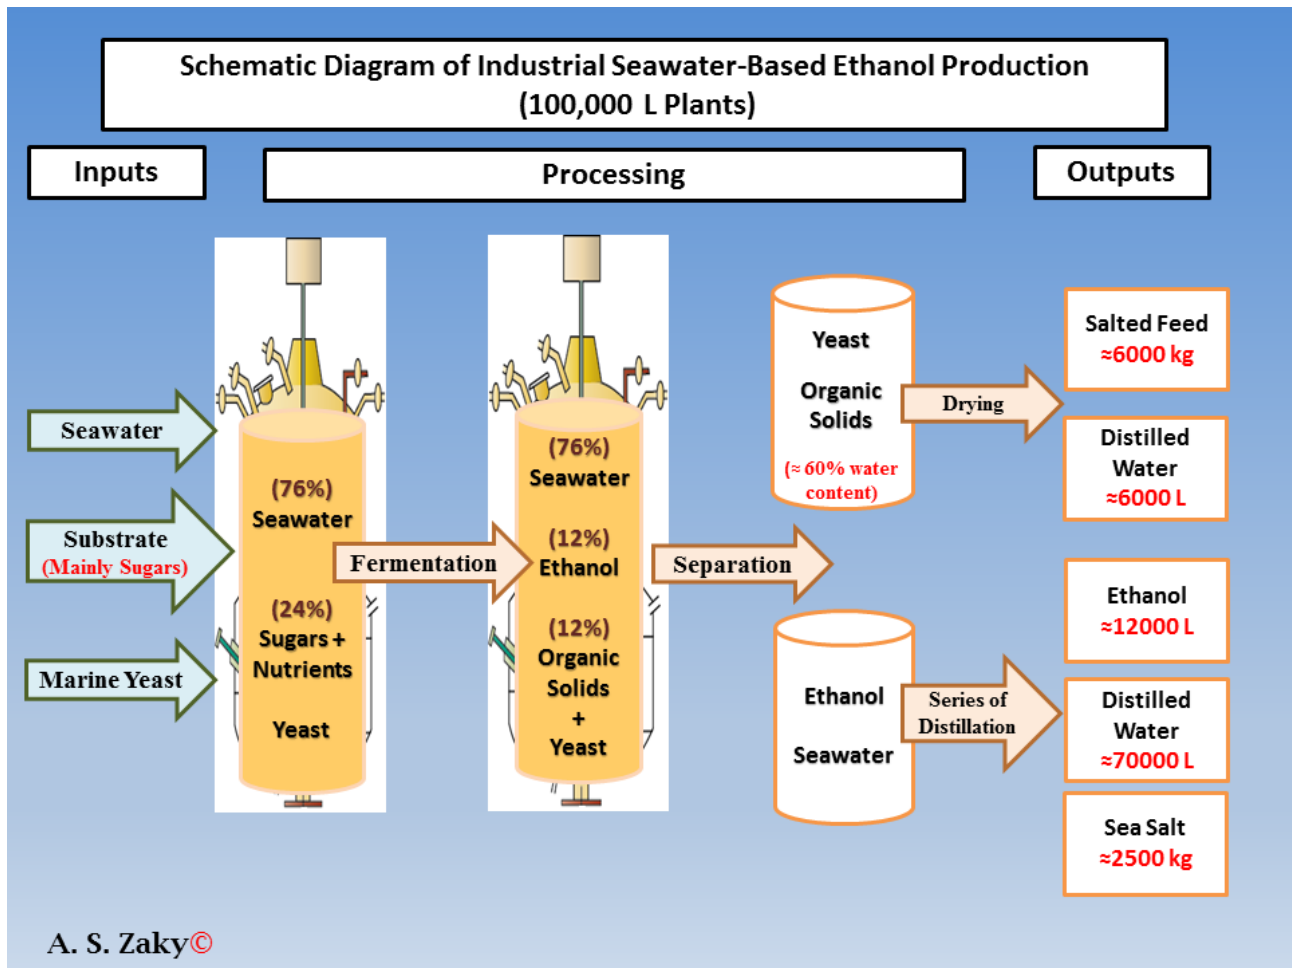

**SF3: Schematic diagram of industrial seawater-based ethanol production (100,000 L plants)**  
 The content of this diagram was firstly suggested by Zaky in 2017 <sup>1</sup>.

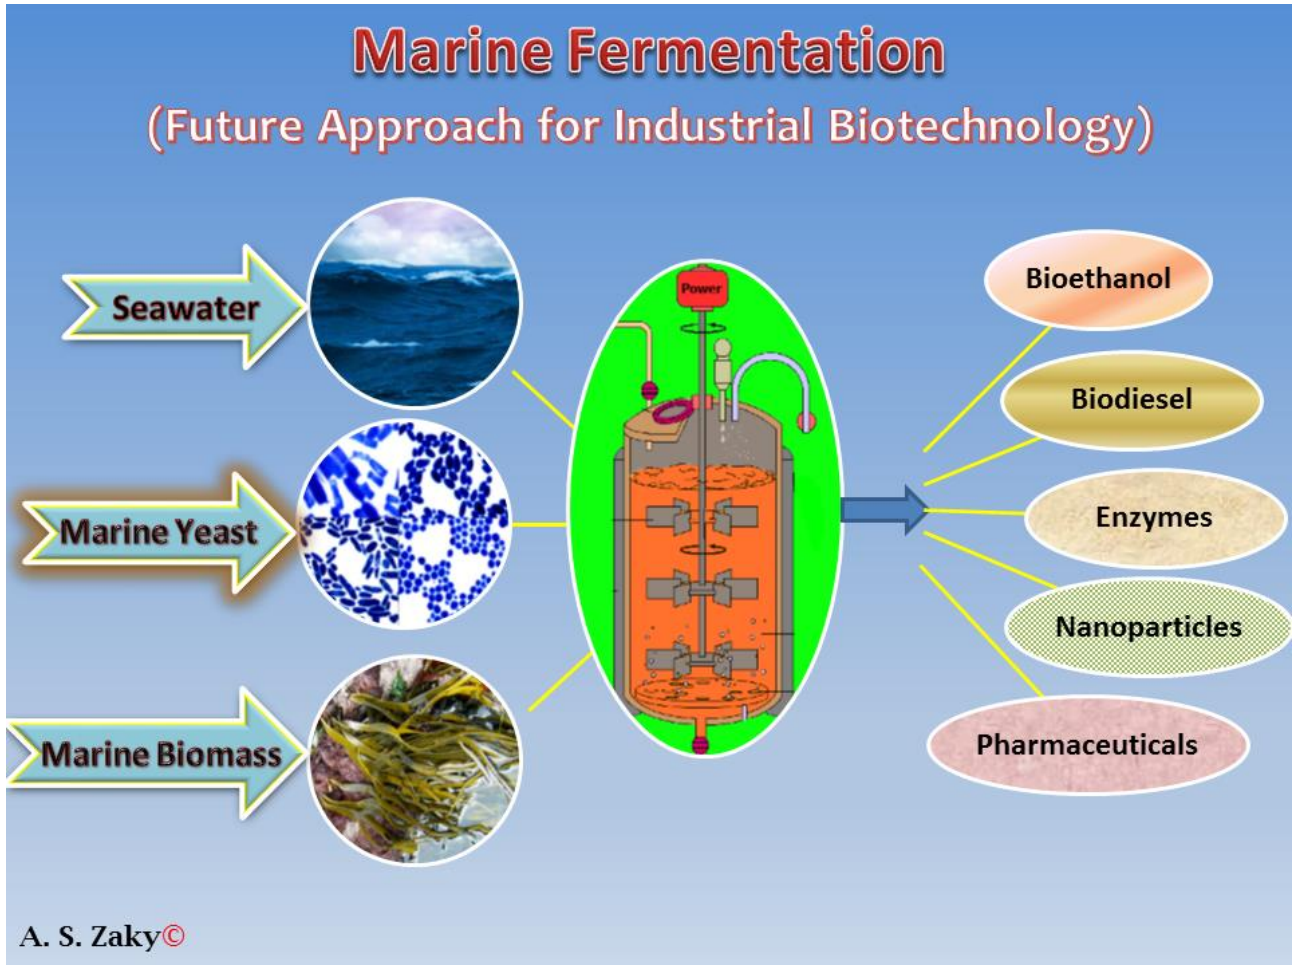

**SF4: Schematic diagram of the elements of Marine fermentation.**

**The concept of marine fermentation was initially introduced by Zaky et al in 2014 <sup>1,2</sup>.**

## References:

- 1 Zaky, A. S. Marine Fermentation, the Sustainable Approach for Bioethanol Production. *EC Microbiology*, 25-27 (2017).
- 2 Zaky, A. S., Tucker, G. A., Daw, Z. Y. & Du, C. Marine yeast isolation and industrial application. *FEMS Yeast Res* 14, 813-825, doi:10.1111/1567-1364.12158 (2014).
